# Supplementary material for: A bacteriophytochrome Pr/Pfr heterodimer as obtained by single-ms TR cryo-EM
Source: Research Square preprint supplement (doi:10.21203/rs.3.rs-8079638/v1), 2025-11-14
Supplement: Supplementary file 1 [file bd5943660e6f734f23f3818e.docx]

**A bacteriophytochrome Pr/Pfr heterodimer as obtained by single-ms TR cryo-EM**

Prabin Karki, William Budell, Rohit Kannachel, David Menendez, Carolina Hernadez, Joshua Mendez, Shemiran Kanou, Manjeet Singh, Chavdar Slavov, Peter Schwander, Tek Narsingh Malla, Emina A. Stojković, Marius Schmidt

**Supplementary Information**

contains

Supplementary Text

Other supplementary information:

Legends for 3 supplementary movies

A short description of a Python script to evaluate photoexcitation

**Molecule excitation**

Since the apparent quantum yield for photoconversion is low (on the order of 17%), it requires the absorption of multiple photons to result in a successful isomerization reaction and related structural changes that result here in a transition from the Pr to the Pfr state. From the estimates of available photon densities, absorption cross-sections and quantum yield it becomes clear that rather large photon densities are required to initiate reactions effectively. With a longer exposure time the photon density and the number of absorption events increase accordingly. For example, with a 20 ms exposure, the probability to find a protomer in the photocycle is 88 %. The same results would be achieved by increasing the laser light intensity five-fold. The numbers provided in Extended Data Table 3 can vary substantially from BphP to BphP since the extinction coefficient, the quantum yield *qpc* and the exact photon density at the grid are only known within limits. The all-important photon density depends also on the ability to accurately measure the size of the laser light focal spot, the laser power at the sample position and the exposure time. Nevertheless, our laser light illumination favors population transfer of a substantial part of the BphP protomers into the photocycle as opposed to our previous experiment with Spotiton that employed a low intensity photodiode to initiate a reaction.

With smaller laser intensities or shorter exposure times, sufficient photoactivation cannot be achieved. This must be accounted for when designing TR cryo-EM experiments with the pump-freeze method. The energy density delivered by the laser to the grid during our 4 ms exposures was on the order of 0.04 mJ/mm2. There is clear room for improvement by using a more intense laser or increase the exposure time to obtain an almost pure Pfr/Pfr state. It must be noted, that for photoreceptors immersed in a thin layer of aqueous solution as used for cryo-EM investigations, the extent of the photoconversion does not depend on the concentration of the molecules but entirely on the incident photon number density, the absorption cross-section of the BV in the BphP and the photoconversion quantum yield. In thick layers of very concentrated molecules such as those in crystals, the incident intensity diminishes in deeper crystal layers, since photons are absorbed by layers closer to the surface. Then, the overall extent of the photoconversion depends critical on the concentration of the molecules (chromophors) and the thickness of the crystals. In any case, if both the absorption cross-section and the quantum yield are small, the number of photons required for an effective photoconversion of a molecular ensemble may be much larger than anticipated. To reach, for example, 95 % photoconversion that would result in 90 % of Pfr/Pfr homodimers in the ensemble, a 500 mW cw-laser source is required that delivers a total energy of 2 mJ with an energy density of 0.3 mJ/mm2 to the grid during the 4 ms illumination. The energy density of 0.3 mJ/mm2 can be compared to that used in time-resolved crystallographic experiments on SaBphP2 where energy densities on the order of 5 mJ/mm2 are used. This is owed to the strong absorption of the crystal that makes effective reaction initiation and population transfer difficult.

**The coiled-coil linker topology that enforces HK rotation**

Extended Data Figure 2 shows three views onto the Pr/Pr structure including its cryo-EM density. Particular attention is drawn to the topology of the coiled-coil consisting of the two linker helices that shows an above-and-below pattern (see also Supplementary Movie 1). A mechanical model consisting of two overlapping strings schematically represents the two linker helices (Extended Data Figure 3). Since in the SaBphP2 Pr/Pfr heterodimer the two linker helices become parallel (Fig. 2 a) the challenge is to mimic the structural transition by achieving a parallel configuration of the two strings by pulling on string B without unphysically penetrating through string A (as in Supplementary Movie 3). Obviously, a parallel configuration of the two helices can only be obtained by a ~180o rotation of the entire 4-helix bundle (represented by the upper part of the line model) as shown in Supplementary Movie 2. Note, an accurate angle can be determined by fitting the PCM region of the Pr/Pr homodimer structure onto that of the Pr/Pfr heterodimer and evaluating the HK orientations. The rotation angle is 174o. In Extended Data Figure 3 b a situation is depicted where a parallel arrangement of the two strings (helices) can be achieved by a sliding mechanism without the necessity of a rotation. However, the required above-and-above pattern is not observed in the SaBphP2 Pr/Pr structure. Extended Data Figure 3 c, finally, the two strings are fixed on the top mimicking a stable 4-helix bundle. Here, again parallel linker helices (red and blue strings) can only be obtained by a ~180o rotation of the HK moiety. This topology is found not only in the SaBphP2 Pr/Pr structure but also in the (metastable) Pr/Pr structure of the *P. aeruginosa* bathy phytochrome. Coiled-coil helices with similar topology are found in other proteins and enzymes, in particular in motor proteins. Unwinding of coiled-coil helix structures accompanied by corresponding motor-head rotations might contribute to the regulation of the enzymatic activity and/or to transiently store excess metabolic energy in these proteins that can be used to make these molecular machines more efficient.

**Other Supplementary Information**

Supplementary Movie 1. Cryo-EM density in the linker region in the structure of the SaBphP2 Pr/Pr homodimer after local refinement to display the above-and-below topology. The linker structure of subunit A is shown in blue, the one of subunit B in red. The HK lobes and their cryo-EM densities are removed for illustration.

Supplementary Movie 2. Morph from the structure of the Pr/Pr homodimer to that of the Pr/Pfr heterodimer by rotating HK lobes. The rotation can occur without inter-penetration of the linker helices. Please note that a morph represents an approximation based on a linear extrapolation between the two structures. While structural details may not be accurately depicted, the overall rotational movement is correctly illustrated.

Supplementary Movie 3. Morph from the structure of the Pr/Pr homodimer to that of the Pr/Pfr heterodimer without rotation of the HK lobes. This transformation is not physically feasible, as the linker helices would inter-penetrate to become parallel to each other. Please note that a morph represents an approximation based on a linear extrapolation between the two structures. While structural details may not be accurately depicted, the “unphysical” penetration of the linker helices is correctly visualized.

Supplementary Script P1. This Python script calculates the quantum yield, the probability of photoexcitation and the relative concentrations of the Pr/Pr, Pr/Pfr and Pfr/Pfr species from the prevalent experimental conditions.
